# Supplementary material
Source: PubMed Central journal article supplement (PMC5911705)
Supplement: Supp_Table1.pdf [file Supp_Table1.pdf]

SUPPLEMENTARY TABLE 1. UNITS, NOMENCLATURE, AND DEFINITIONS OF THE CANCELLOUS AND CORTICAL BONE VARIABLES MEASURED IN THE TIBIA (VIA HISTOMORPHOMETRY) AND FEMUR (VIA  $\mu$ CT)

| <i>Bone variable</i>                | <i>Units</i>                             | <i>Symbol</i> | <i>Definition</i>                                                    |
|-------------------------------------|------------------------------------------|---------------|----------------------------------------------------------------------|
| <i>Histomorphometry</i>             |                                          |               |                                                                      |
| Cancellous bone volume              | %                                        | Cn.BV/TV      | Ratio of bone area to the total area of marrow space                 |
| Trabecular number                   | #/mm                                     | Tb.N          | Average number of trabeculae per mm                                  |
| Trabecular width                    | $\mu$ m                                  | Tb.Wi         | Average 2D thickness of trabeculae                                   |
| Trabecular separation               | $\mu$ m                                  | Tb.Sp         | Average 2D distance between trabeculae                               |
| Cortical tissue area                | $\text{mm}^2$                            | Ct.T.Ar       | Total cross-sectional area from the periosteal perimeter inward      |
| Cortical bone area                  | $\text{mm}^2$                            | Ct.B.Ar       | Total cross-sectional area encompassed by cortical bone              |
| Marrow area                         | $\text{mm}^2$                            | Ma.Ar         | Total cross-sectional area encompassing the marrow cavity            |
| Cortical width                      | $\mu$ m                                  | Ct.Wi         | Average cortical thickness                                           |
| Osteoblast surface                  | %                                        | Ob.S/BS       | Percent of bone surface occupied by osteoblasts                      |
| Osteoclast surface                  | %                                        | Oc.S/BS       | Percent of bone surface occupied by osteoclasts                      |
| Osteoid surface                     | %                                        | OS/BS         | Percent of bone surface occupied by osteoids                         |
| Mineralizing surface                | %                                        | MS/BS         | Percent of mineralizing surface per bone surface                     |
| Periosteal surface                  | %                                        | Ps.MS/BS      | Mineralizing surface at periosteal perimeter                         |
| Endocortical surface                | %                                        | Ec.MS/BS      | Mineralizing surface at endocortical perimeter                       |
| Mineral apposition rate             | $\mu\text{m}/\text{d}$                   | MAR           | Rate of mineral apposition per day                                   |
| Bone formation rate                 | $\mu\text{m}^3/\mu\text{m}^2/\text{day}$ | BFR/BS        | Rate of bone formation per day                                       |
| <i><math>\mu</math>CT variables</i> |                                          |               |                                                                      |
| Cancellous bone volume              | %                                        | BV/TV         | Ratio of cancellous bone volume to total volume in marrow space      |
| Trabecular number                   | #/mm                                     | Tb.N          | Average number of trabeculae per mm                                  |
| Trabecular thickness                | mm                                       | Tb.Th         | Mean 3D thickness of trabeculae                                      |
| Trabecular separation               | mm                                       | Tb.Sp         | Mean 3D distance between trabeculae                                  |
| Structural model index              | no units                                 | SMI           | Indicator of trabecular shape; 0=parallel plates, 3=cylindrical rods |
| Total bone area                     | $\text{mm}^2$                            | Tt.Ar         | Total cross-sectional area from the periosteal perimeter inward      |
| Cortical bone area                  | $\text{mm}^2$                            | Ct.Ar         | Total cross-sectional area encompassed by cortical bone              |
| Medullary area                      | $\text{mm}^2$                            | Ma.Ar         | Area encompassing the marrow cavity                                  |
| Cortical area fraction              | %                                        | Ct.Ar/Tt.Ar   | Ratio of cortical bone area to total bone area                       |
| Cortical thickness                  | mm                                       | Ct.Th         | Average cortical thickness                                           |

Cancellous variables were measured in the region of interest (ROI) at the proximal tibial metaphysis (histomorphometry) or distal femoral metaphysis ( $\mu$ CT). Cortical variables were measured in the ROI at the tibial diaphysis (histomorphometry) or femoral diaphysis ( $\mu$ CT). Readers are directed to citations<sup>29-31</sup> for in-depth reviews of skeletal histomorphometry and to citation<sup>32</sup> for further review of  $\mu$ CT assessment of bone morphometry.
