# Supplementary material
Source: PubMed Central journal article supplement (PMC5911705)
Supplement: Supp_Table2.pdf [file Supp_Table2.pdf]

SUPPLEMENTARY TABLE 2. PEARSON CORRELATION COEFFICIENTS FOR SERUM TESTOSTERONE/ESTRADIOL AND BONE/MUSCLE STRUCTURAL OUTCOMES FOR ANIMALS SUBJECTED TO MODERATE/SEVERE (250 KDYNE) SPINAL CORD INJURY ALONE OR IN COMBINATION WITH A LOW- OR HIGH-DOSE OF TESTOSTERONE-ENANTHATE

|                                                       | <i>Testosterone (ng/mL)</i> | <i>Estradiol (pg/mL)</i> |
|-------------------------------------------------------|-----------------------------|--------------------------|
| Tibial Cn.BV/TV, %                                    | $r=0.542, p<0.01$           | N/S                      |
| Tibial Tb.N, #/mm                                     | $r=0.520, p<0.05$           | N/S                      |
| Tibial Tb.Wi, $\mu\text{m}$                           | $r=0.405, p=0.055$ (trend)  | N/S                      |
| Tibial Tb.Sp, $\mu\text{m}$                           | $r=-0.511, p<0.05$          | N/S                      |
| Femoral Cn.BV/TV, %                                   | $r=0.571, p<0.01$           | N/S                      |
| Femoral Tb.N, #/mm                                    | $r=0.591, p<0.01$           | N/S                      |
| Distal femur cancellous vBMD, $\text{mg}/\text{cm}^3$ | $r=0.548, p<0.01$           | N/S                      |
| SMI                                                   | $r=-0.571, p<0.01$          | N/S                      |
| LABC muscle mass, g                                   | $r=0.686, p<0.001$          | N/S                      |
| Prostate mass, g                                      | $r=0.566, p<0.01$           | N/S                      |

Values represent Pearson correlation coefficients and corresponding  $p$  values,  $n=24-26$  animals per analysis. Significant correlations were not observed between testosterone/estradiol and bone/muscle structural measurements that are not presented in this table. N/S, not significant; Cn.BV/TV, cancellous bone volume; Tb.N, trabecular number; Tb.Wi, trabecular width; Tb.Sp, trabecular separation; vBMD, volumetric bone mineral density; SMI, structure model index; LABC, levator ani/bulbocavernosus.
